# Supplementary material for: Increasing risk of mortality across the spectrum of aortic stenosis is independent of comorbidity & treatment: An international, parallel cohort study of 248,464 patients
Source: PLOS journal article supplement (doi:10.1371/journal.pone.0268580), 2022-07-11
Supplement: S5 (10.1371/journal.pone.0268580.s005) [file journal.pone.0268580.s005]

**S1 Table. Definition and Sources of Covariate Information**

| Variable                                 | Definition                                                                                                                                                                                                               | Timing                                                        | Data Source                       | Cohorts Available |
|------------------------------------------|--------------------------------------------------------------------------------------------------------------------------------------------------------------------------------------------------------------------------|---------------------------------------------------------------|-----------------------------------|-------------------|
| <b>Demographics</b>                      |                                                                                                                                                                                                                          |                                                               |                                   |                   |
| Age                                      | Age in years                                                                                                                                                                                                             | At the time of TTE                                            | TTE report                        | Australia + US    |
| Sex                                      | Self-assigned sex                                                                                                                                                                                                        | At the time of TTE                                            | TTE report                        | Australia + US    |
| Race                                     | Self-assigned race: black, white, or other                                                                                                                                                                               | At the time of TTE                                            | Medicare beneficiary summary file | US                |
| Blood pressure                           | Systolic and diastolic blood pressures in mmHg                                                                                                                                                                           | At the time of TTE                                            | TTE report                        | Australia + US    |
| Heart rate                               | Heart rate in beats per minute                                                                                                                                                                                           | At the time of left ventricular outflow tract VTI acquisition | TTE report                        | Australia + US    |
| Height                                   | Reported height (cm)                                                                                                                                                                                                     | At the time of TTE                                            | TTE report                        | Australia + US    |
| Weight                                   | Reported weight (kg)                                                                                                                                                                                                     | At the time of TTE                                            | TTE report                        | Australia + US    |
| Body surface area                        | Defined using the Mosteller formula <sup>1</sup> (m <sup>2</sup> )                                                                                                                                                       | At the time of TTE                                            | TTE report                        | Australia + US    |
| Body mass index                          | Weight per height-squared (kg/m <sup>2</sup> )                                                                                                                                                                           | At the time of TTE                                            | TTE report                        | Australia + US    |
| Inpatient/outpatient status              | Status of patient (admitted to inpatient facility or not)                                                                                                                                                                | At the time of TTE                                            | TTE report                        | US                |
| <b>Echocardiographic Data</b>            |                                                                                                                                                                                                                          |                                                               |                                   |                   |
| Technical quality                        | Defined by interpreting physician as adequate or suboptimal ( $\geq 2$ or more nonvisualized segments)                                                                                                                   | At the time of TTE                                            | TTE report                        | Australia + US    |
| Left ventricular end-diastolic dimension | Left ventricular end-diastolic dimension in the apical long-axis view at the level of the mitral valve (cm)                                                                                                              | At the time of TTE                                            | TTE report                        | Australia + US    |
| Left ventricular end-systolic dimension  | Left ventricular end-systolic dimension in the apical long-axis view at the level of the mitral valve (cm)                                                                                                               | At the time of TTE                                            | TTE report                        | Australia + US    |
| Left ventricular ejection fraction       | Defined by the interpreting physician on the TTE report (includes visual assessment, biplane method of disks, and 3-dimensional volumetric quantification) using percentages.                                            | At the time of TTE                                            | TTE report                        | Australia + US    |
| E/e' ratio                               | Ratio of transmitral peak E-wave velocity and the average of septal and mitral tissue doppler e' values                                                                                                                  | At the time of TTE                                            | TTE report                        | Australia + US    |
| E/A ratio                                | Ratio of the transmitral peak E-wave velocity and peak A-wave velocity                                                                                                                                                   | At the time of TTE                                            | TTE report                        | Australia + US    |
| Stroke volume index                      | Defined as stroke volume divided by body surface area. Stroke volume was defined as the left ventricular outflow tract area multiplied by the left ventricular outflow tract velocity-time-integral (mL/m <sup>2</sup> ) | At the time of TTE                                            | TTE report                        | Australia + US    |

|                                             |                                                                                                                                                                                                                                                                              |                             |                                          |                |
|---------------------------------------------|------------------------------------------------------------------------------------------------------------------------------------------------------------------------------------------------------------------------------------------------------------------------------|-----------------------------|------------------------------------------|----------------|
| Left ventricular outflow tract velocity/VTI | Peak left ventricular outflow tract velocity or velocity-time-integral (m/s for velocity, cm for VTI)                                                                                                                                                                        | At the time of TTE          | TTE report                               | Australia + US |
| Left ventricular mass index                 | Left ventricular mass was defined using the Devereux formula <sup>2</sup> and divided by body surface area (g/m <sup>2</sup> )                                                                                                                                               | At the time of TTE          | TTE report                               | Australia + US |
| Peak tricuspid regurgitant velocity         | Peak tricuspid regurgitant Doppler velocity (m/s)                                                                                                                                                                                                                            | At the time of TTE          | TTE report                               | Australia + US |
| Right ventricular basal dimension           | Measurement of the basal right ventricle in a modified right ventricular focused apical 4-chamber view at end-diastole (cm)                                                                                                                                                  | At the time of TTE          | TTE report                               | Australia + US |
| Right atrial length                         | Maximal length from annulus to right atrial roof in the apical 4-chamber view at end-systole (cm)                                                                                                                                                                            | At the time of TTE          | TTE report                               | Australia + US |
| Left atrial volume index                    | Biplane left atrial volume (obtained in apical 4 and 2 chamber views) divided by body surface area (mL/m <sup>2</sup> )                                                                                                                                                      | At the time of TTE          | TTE report                               | Australia + US |
| Aortic regurgitation severity               | Semiquantitative measure of aortic regurgitation severity (0+, 1+, 2+, 3+, 4+) by interpreting physician using an integrative approach                                                                                                                                       | At the time of TTE          | TTE report                               | Australia + US |
| Mitral regurgitation severity               | Semiquantitative measure of mitral regurgitation severity (0+, 1+, 2+, 3+, 4+) by interpreting physician using an integrative approach                                                                                                                                       | At the time of TTE          | TTE report                               | Australia + US |
| Presence of a bicuspid aortic valve         | Bicuspid or bicommissural aortic valve on visual inspection                                                                                                                                                                                                                  | At the time of TTE          | TTE report                               | Australia + US |
| Transmitral mean pressure gradient          | Mean pressure gradient across the mitral valve during diastole, using the VTI of pulsed-wave Doppler at the mitral leaflets tips                                                                                                                                             | At the time of TTE          | TTE report                               | Australia + US |
| Peak aortic velocity                        | Peak transaortic velocity (m/s)                                                                                                                                                                                                                                              | At the time of TTE          | TTE report                               | Australia + US |
| Mean aortic valve gradient                  | Mean transaortic gradient during systole using the VTI of the aortic Doppler (mmHg). In the US cohort, mean gradient (per lab protocol) was only recorded in those with a peak aortic velocity > 2.0 m/s.                                                                    | At the time of TTE          | TTE report                               | Australia + US |
| Aortic valve area                           | Calculated aortic valve area using the continuity equation (cm <sup>2</sup> ). In the US cohort, aortic valve area (per lab protocol) was only recorded in those with a peak aortic velocity > 2.0 m/s.                                                                      | At the time of TTE          | TTE report                               | Australia + US |
| Left heart disease                          | Defined as either left ventricular ejection fraction < 55%, transmitral E/e' > 12.0, left atrial volume index > 34.0 mL/m <sup>2</sup> , or presence of left sided valvular heart disease (transmitral mean gradient ≥ 5 mmHg, 2+ or greater aortic or mitral regurgitation) | At the time of TTE          | TTE report                               | Australia + US |
| <b>Clinical Variables</b>                   |                                                                                                                                                                                                                                                                              |                             |                                          |                |
| Diabetes Mellitus                           | Presence of an inpatient or outpatient claim for diabetes mellitus using Medicare Chronic Condition Warehouse validated algorithm <sup>3-4</sup>                                                                                                                             | Within 2-years prior to TTE | Medicare inpatient and outpatient claims | US             |

|                                               |                                                                                                                                                                                            |                             |                                          |    |
|-----------------------------------------------|--------------------------------------------------------------------------------------------------------------------------------------------------------------------------------------------|-----------------------------|------------------------------------------|----|
| Hypertension                                  | Presence of an inpatient or outpatient claim for hypertension using Medicare Chronic Condition Warehouse validated algorithm <sup>4,5-9</sup>                                              | Within 1-year prior to TTE  | Medicare inpatient and outpatient claims | US |
| Hyperlipidemia                                | Presence of an inpatient or outpatient claim for hyperlipidemia using Medicare Chronic Condition Warehouse validated algorithm <sup>9-11</sup>                                             | Within 1-year prior to TTE  | Medicare inpatient and outpatient claims | US |
| Smoking                                       | Presence of an inpatient or outpatient claim for smoking using Medicare Chronic Condition Warehouse validated algorithm <sup>12</sup>                                                      | Within 2-years prior to TTE | Medicare inpatient and outpatient claims | US |
| Chronic obstructive pulmonary disease         | Presence of an inpatient or outpatient claim for chronic obstructive pulmonary disease using Medicare Chronic Condition Warehouse validated algorithm <sup>13</sup>                        | Within 1-year prior to TTE  | Medicare inpatient and outpatient claims | US |
| Chronic kidney disease                        | Presence of an inpatient or outpatient claim for chronic kidney disease using Medicare Chronic Condition Warehouse validated algorithm <sup>14-16</sup>                                    | Within 2-years prior to TTE | Medicare inpatient and outpatient claims | US |
| Ischemic heart disease                        | Presence of an inpatient or outpatient claim for ischemic heart disease using Medicare Chronic Condition Warehouse validated algorithm <sup>17-18</sup>                                    | Within 2-years prior to TTE | Medicare inpatient and outpatient claims | US |
| Peripheral arterial disease                   | Presence of an inpatient claim for peripheral arterial disease using the Charlson Comorbidity Index <sup>19</sup>                                                                          | Within 2-years prior to TTE | Medicare inpatient and outpatient claims | US |
| Atrial fibrillation                           | Presence of an inpatient or outpatient claim for atrial fibrillation using Medicare Chronic Condition Warehouse validated algorithm <sup>20-21</sup>                                       | Within 1-year prior to TTE  | Medicare inpatient and outpatient claims | US |
| Heart failure                                 | Presence of an inpatient or outpatient claim for heart failure using Medicare Chronic Condition Warehouse validated algorithm <sup>4,22</sup>                                              | Within 2-years prior to TTE | Medicare inpatient and outpatient claims | US |
| Ischemic stroke / transient ischemic attack   | Presence of an inpatient claim using validated algorithms for ischemic stroke or transient ischemia attack <sup>23</sup>                                                                   | Within 2-years prior to TTE | Medicare inpatient and outpatient claims | US |
| Dementia                                      | Presence of an inpatient or outpatient claim for dementia using Medicare Chronic Condition Warehouse validated algorithm <sup>24</sup>                                                     | Within 2-years prior to TTE | Medicare inpatient and outpatient claims | US |
| Anemia                                        | Presence of an inpatient or outpatient claim for anemia using Medicare Chronic Condition Warehouse validated algorithm <sup>25-26</sup>                                                    | Within 1-year prior to TTE  | Medicare inpatient and outpatient claims | US |
| Cancer                                        | Presence of an inpatient or outpatient claim for lung, prostate, breast, colorectal, or endometrial cancer using Medicare Chronic Condition Warehouse validated algorithm <sup>27-40</sup> | Within 1-year prior to TTE  | Medicare inpatient and outpatient claims | US |
| <b>Interventions</b>                          |                                                                                                                                                                                            |                             |                                          |    |
| History of percutaneous coronary intervention | Presence of an ICD-9-CM (17.55, 36.04, 36.06, 36.07, 36.09) or ICD-10-CM (02703DZ, 02713DZ, 02723DZ, 02733DZ, 027034Z,                                                                     | Within 1-year prior to TTE  | Medicare inpatient and outpatient claims | US |

|                                                                 |                                                                                                                                                                             |                                  |                                          |                |
|-----------------------------------------------------------------|-----------------------------------------------------------------------------------------------------------------------------------------------------------------------------|----------------------------------|------------------------------------------|----------------|
|                                                                 | 027134Z, 027234Z, 027334Z)<br>procedural code for percutaneous coronary intervention                                                                                        |                                  |                                          |                |
| History of coronary artery bypass grafting                      | Presence of an ICD-9-CM (36.10, 36.11, 36.12, 36.13, 36.14, 36.15, 36.16, 36.17, 36.19) or ICD-10-CM procedural code for coronary artery bypass grafting <sup>41</sup>      | Within 1-year prior to TTE       | Medicare inpatient and outpatient claims | US             |
| Presence of pacemaker or implantable cardioverter defibrillator | Presence of a pacemaker or right ventricular wire on TTE                                                                                                                    | At the time of TTE               | TTE report                               | US             |
| History of aortic valve replacement                             | Presence of an aortic valve replacement on TTE                                                                                                                              | At the time of TTE               | TTE report                               | Australia + US |
| History of mitral valve replacement/repair                      | Presence of a mitral valve intervention (surgical or transcatheter) on TTE                                                                                                  | At the time of TTE               | TTE report                               | Australia + US |
| History of tricuspid valve replacement/repair                   | Presence of a tricuspid valve intervention (surgical or transcatheter) on TTE                                                                                               | At the time of TTE               | TTE report                               | Australia + US |
| <b>Medications (prescribed)</b>                                 |                                                                                                                                                                             |                                  |                                          |                |
| Antiplatelets                                                   | Includes platelet-aggregation inhibitors, salicylates, and platelet-reducing agents                                                                                         | Within the 1 month preceding TTE | Linkage with institutional data          | US             |
| Anticoagulants                                                  | Includes coumarin derivatives, direct factor Xa inhibitors, direct thrombin inhibitors, and other anticoagulants                                                            | Within the 1 month preceding TTE | Linkage with institutional data          | US             |
| Beta blockers                                                   | Includes nonselective and selective beta-adrenergic blockers                                                                                                                | Within the 1 month preceding TTE | Linkage with institutional data          | US             |
| Cholesterol modification agents                                 | Includes statin medications, fibrates, bile acid sequestrants, proprotein convertase subtilisin/kexin type 9 (PCSK9) inhibitors, or other antilipidemic agents              | Within the 1 month preceding TTE | Linkage with institutional data          | US             |
| Renin-angiotensin-neprilysin inhibitors                         | Includes angiotensin-converting enzyme inhibitors, angiotensin II receptor antagonists, renin inhibitors, and neprilysin inhibitors                                         | Within the 1 month preceding TTE | Linkage with institutional data          | US             |
| Other anti-hypertensives                                        | Includes miscellaneous hypotensive or vasodilating agents, calcium channel blockers, alpha-adrenergic blockers, and central alpha-adrenergic agonists                       | Within the 1 month preceding TTE | Linkage with institutional data          | US             |
| Anti-arrhythmic medications                                     | Includes classes 1A, 1B, 1C, II, III, IV, and miscellaneous                                                                                                                 | Within the 1 month preceding TTE | Linkage with institutional data          | US             |
| Diuretics                                                       | Includes loop diuretics, thiazide diuretics, potassium-sparing diuretics, mineralocorticoid (aldosterone) antagonists, thiazide-like diuretics, and miscellaneous diuretics | Within the 1 month preceding TTE | Linkage with institutional data          | US             |
| Insulin                                                         | Includes short and long-acting insulins                                                                                                                                     | Within the 1 month               | Linkage with                             | US             |

|                                      |                                                                                                                                                                                                                                                                                           |                                                 |                                 |    |
|--------------------------------------|-------------------------------------------------------------------------------------------------------------------------------------------------------------------------------------------------------------------------------------------------------------------------------------------|-------------------------------------------------|---------------------------------|----|
|                                      |                                                                                                                                                                                                                                                                                           | preceding TTE                                   | institutional data              |    |
| Anti-diabetic medications            | Includes biguanides, dipeptidyl peptidase-4 inhibitors, sulfonylureas, thiazolidinediones, alpha-glucosidase inhibitors, sodium-glucose cotransporter 2 inhibitors, and miscellaneous glycemic agents                                                                                     | Within the 1 month preceding TTE                | Linkage with institutional data | US |
| Nitrates                             | Includes nitrates and nitrites                                                                                                                                                                                                                                                            | Within the 1 month preceding TTE                | Linkage with institutional data | US |
| Digoxin/digitalis                    | Includes cardiotonic agents such as digoxin and digitalis-containing compounds                                                                                                                                                                                                            | Within the 1 month preceding TTE                | Linkage with institutional data | US |
| Psychiatric treatments               | Includes selective serotonin reuptake inhibitors, anticonvulsants, antimuscarinics, tricyclic antidepressants, serotonin norepinephrine reuptake inhibitors, amphetamines, anticholinergic and parasympathomimetic agents, antipsychotic agents, and monoamine oxidase inhibitors         | Within the 1 month preceding TTE                | Linkage with institutional data | US |
| Anti-inflammatory medications        | Includes salicylates, cyclooxygenase-2 inhibitors, and other non-steroidal anti-inflammatory drugs                                                                                                                                                                                        | Within the 1 month preceding TTE                | Linkage with institutional data | US |
| Other                                | Includes hormonal agents (corticosteroids, estrogens, antithyroid medications), anticholinergic and beta agonist inhalers, vasopressors, antigout agents, iron agents, histamine-2 antagonists, phosphodiesterase type 5 inhibitors, phosphodiesterase type 4 inhibitors, and anorexigens | Within the 1 month preceding TTE                | Linkage with institutional data | US |
| <b>Laboratory Variables</b>          |                                                                                                                                                                                                                                                                                           |                                                 |                                 |    |
| Hemoglobin a1c                       | Glycated hemoglobin (% of total hemoglobin)                                                                                                                                                                                                                                               | Most recent value within 3 months preceding TTE | Linkage with institutional data | US |
| Hemoglobin                           | Calculated using the Sysmex ® XN Series assay (g/dL)                                                                                                                                                                                                                                      | Most recent value within 3 months preceding TTE | Linkage with institutional data | US |
| Low density lipoprotein cholesterol  | Fasting low-density lipoprotein (mg/dL)                                                                                                                                                                                                                                                   | Most recent value within 3 months preceding TTE | Linkage with institutional data | US |
| Estimated glomerular filtration rate | Using the Modification of Diet in Renal Disease (MDRD) equation, estimated using serum creatinine (mg/dL; Roche® Cobas, Creatinine (CREJ2) Assay) and reported in mL/minute                                                                                                               | Most recent value within 3 months preceding TTE | Linkage with institutional data | US |

|                                          |                                                                                                         |                                                 |                                 |    |
|------------------------------------------|---------------------------------------------------------------------------------------------------------|-------------------------------------------------|---------------------------------|----|
| N-terminal pro-brain natriuretic peptide | Calculated using the Roche® Cobas, N-terminal pro B-type natriuretic peptide (proBNP) Assay (pg/mL)     | Most recent value within 3 months preceding TTE | Linkage with institutional data | US |
| Troponin T                               | Calculated using the Roche® Cobas, Troponin T Stat ElectroChemiLuminescence ImmunoAssay (ECLIA) (ng/mL) | Most recent value within 3 months preceding TTE | Linkage with institutional data | US |
| Blood urea nitrogen                      | Blood urea nitrogen concentration (mg/dL)                                                               | Most recent value within 3 months preceding TTE | Linkage with institutional data | US |

TTE = transthoracic echocardiogram; US = United States

#### References:

- 1) Mosteller RD. Simplified calculation of body-surface area. *N Engl J Med*. 1988;317(17): 1098.
- 2) Devereux RB, Alonso DR, Lutas EM, et al. Echocardiographic assessment of left ventricular hypertrophy: comparison to necropsy findings. *Am J Cardiol*. 1986;57: 540.
- 3) Rector TS, Wickstrom SL, Shah M, et al. Specificity and sensitivity of claims-based algorithms for identifying members of Medicare+Choice health plans that have chronic medical conditions. *Health Serv Res*. 2004;39(6 Pt 1):1839-1857.
- 4) Hebert PL, Geiss LS, Tierney EF, Engelgau MM, Yawn BP, McBean AM. Identifying persons with diabetes using Medicare claims data. *Am J Med Quality*. 1999;14(6):270-277.
- 5) Borzecki AM, Wong AT, Hickey EC, Ash AS, Berlowitz DR. Identifying hypertension-related comorbidities from administrative data: what's the optimal approach? *Am J Med Quality*. 2004;19(5):201-206.
- 6) Dutro MP, Gerthoffer TD, Peterson ED, Tang SS, Goldberg GA. Treatment of hypertension and dyslipidemia or their combination among US managed-care patients. *J Clin Hypertension* 2007;9(9):684-691.
- 7) Halpern MT, Khan ZM, Schmier JK, et al. Recommendations for evaluating compliance and persistence with hypertension therapy using retrospective data. *Hypertension*. 2006;47(6):1039-1048.
- 8) Quam L, Ellis LB, Venus P, Clouse J, Taylor CG, Leatherman S. Using claims data for epidemiologic research. The concordance of claims-based criteria with the medical record and patient survey for identifying a hypertensive population. *Med Care*. 1993;31(6):498-507.
- 9) Black L, Runken MC, Eaddy M, Shah M. Chronic disease prevalence and burden in elderly men: an analysis of Medicare medical claims data. *J Health Care Finance*. 2007;33(4):68-78.
- 10) Issets BJ, Schondelmeyer SW, Artz MB, et al. Clinical and economic outcomes of medication therapy management services: the Minnesota experience. *J Am Pharmacists Assoc*. 2008;48(2):203-211; 203 p following 211.
- 11) Southern DA, Norris CM, Quan H, et al. An administrative data merging solution for dealing with missing data in a clinical registry: adaptation from ICD-9 to ICD-10. *BMC Med Research Methodology*. 2008;8:1.
- 12) Gorina Y, Kramarow EA. Identifying chronic conditions in Medicare claims data: evaluating the Chronic Condition Data Warehouse algorithm. *Health Serv Res*. 2011;46(5):1610-1627.
- 13) Singh JA. Accuracy of Veterans Affairs databases for diagnoses of chronic diseases. *Preventing Chronic Disease*. 2009;6(4):A126.
- 14) Collins AJ, Chen SC, Gilbertson DT, Foley RN. CKD surveillance using administrative data: impact on the health care system. *Am J Kidney Diseases*. 2009;53(3 Suppl 3):S27-36.
- 15) Foley RN, Murray AM, Li S, et al. Chronic kidney disease and the risk for cardiovascular disease, renal replacement, and death in the United States Medicare population, 1998 to 1999. *J Am Soc Nephrol*. 2005;16(2):489-495.
- 16) Winkelmayer WC, Schneeweiss S, Mogun H, Patrick AR, Avorn J, Solomon DH. Identification of individuals with CKD from Medicare claims data: a validation study. *Am J Kidney Diseases*. 2005;46(2):225-232.

- 17) DiMartino LD, Hammill BG, Curtis LH, et al. External validity of the cardiovascular health study: a comparison with the Medicare population. *Med Care*. 2009;47(8):916-923.
- 18) Johnson ML, Petersen LA, Sundaravaradan R, et al. The association of Medicare drug coverage with use of evidence-based medications in the Veterans Health Administration. *Ann Pharmacotherapy*. 2009;43(10):1565-1575.
- 19) Radanovic D, Seifert B, Urban P, et al. Validity of Charlson Comorbidity Index in patients hospitalised with acute coronary syndrome. Insights from the nationwide AMIS Plus registry 2002-2012. *Heart*. 2014;100(4):288-294.
- 20) Ellis ER, Culler SD, Simon AW, Reynolds MR. Trends in utilization and complications of catheter ablation for atrial fibrillation in Medicare beneficiaries. *Heart Rhythm*. 2009;6(9):1267-1273.
- 21) Gage BF, Boechler M, Doggette AL, et al. Adverse outcomes and predictors of underuse of antithrombotic therapy in medicare beneficiaries with chronic atrial fibrillation. *Stroke*. 2000;31(4):822-827.
- 22) Birman-Deych E, Waterman AD, Yan Y, Nilasena DS, Radford MJ, Gage BF. Accuracy of ICD-9-CM codes for identifying cardiovascular and stroke risk factors. *Med Care*. 2005;43(5):480-485.
- 23) Strom JB, Zhao Y, Faridi KF, et al. Comparison of Clinical Trials and Administrative Claims to Identify Stroke Among Patients Undergoing Aortic Valve Replacement: Findings From the EXTEND Study. *Circ Cardiovasc Interv*. 2019;12(11):e008231.
- 24) Taylor DH, Fillenbaum GG, Ezell ME. The accuracy of Medicare claims data in identifying Alzheimer's disease. *J Clin Epidemiol*. 2002; 55:929-937.
- 25) Herzog CA, Muster HA, Li S, Collins AJ. Impact of congestive heart failure, chronic kidney disease, and anemia on survival in the Medicare population. *J Cardiac Fail*; 2004;10(6), 467-472.
- 26) Sandgren, PE, Murray AM, Herzog CA, Solid CA, Gilbertson, DT, Collins, AJ, et al. Anemia and new-onset congestive heart failure in the general Medicare population. *J Cardiac Fail*. 2005; 11(2), 99-105.
- 27) Cooper GS, Yuan Z, Stange KC, Dennis LK, Amini SB, Rimm AA. The sensitivity of Medicare claims data for case ascertainment of six common cancers. *Med Care*. 1999; 37(5):436-44.
- 28) Cooper GS, Yuan Z, Stange KC, Rimm AA. Use of Medicare claims data to measure county-level variations in the incidence of colorectal carcinoma. *Cancer*. 1998; 83(4):673-8.
- 29) Freeman JL, Zhang D, Freeman DH, Goodwin JS. An approach to identifying incident breast cancer cases using Medicare claims data. *J Clin Epidemiol*. 2000; 53(6):605-14.
- 30) Koroukian SM, Cooper GS, Rimm AA. Ability of Medicaid claims data to identify incident cases of breast cancer in the Ohio Medicaid population. *Health Serv Res*. 2003; 38(3):947-60.
- 31) McBean AM, Warren JL, Babish JD. Measuring the incidence of cancer in elderly Americans using Medicare claims data. *Cancer*. 1994; 73(9):2417-25.
- 32) McBean AM, Babish JD, Warren JL. Determination of lung cancer incidence in the elderly using Medicare claims data. *Am J Epidemiol*. 1993; 137(2):226-34.
- 33) McClish D, Penberthy L, Pugh A. Using Medicare claims to identify second primary cancers and recurrences in order to supplement a cancer registry. *J Clin Epidemiol*. 2003; 56(8):760-7.
- 34) McClish DK, Penberthy L, Whittemore M, et al. Ability of Medicare claims data and cancer registries to identify cancer cases and treatment. *Am J Epidemiol*. 1997; 145(3):227-33.
- 35) McClish D, Penberthy L. Using Medicare data to estimate the number of cases missed by a cancer registry: a 3-source capture- recapture model. *Med Care*. 2004; 42(11):1111-6.
- 36) Moy CS, McCarty DJ, Libman IM, LaPorte RE. Determination of lung cancer incidence in the elderly using Medicare claims data. *Am J Epidemiol*. 1994; 139(4):447-9.
- 37) Nattinger AB, Laud PW, Bajorunaite R, Sparapani RA, Freeman JL. An algorithm for the use of Medicare claims data to identify women with incident breast cancer. *Health Serv Res*. 2004; 39(6 Pt 1):1733-49.
- 38) Wang PS, Walker AM, Tsuang MT, Orav EJ, Levin R, Avorn J. Finding incident breast cancer cases through US claims data and a state cancer registry. *Cancer Causes Control*. 2001; 12(3):257-65.
- 39) Warren JL, Feuer E, Potosky AL, Riley GF, Lynch CF. Use of Medicare hospital and physician data to assess breast cancer incidence. *Med Care*. 1999; 37(5):445-56.
- 40) Whittle J, Steinberg EP, Anderson GF, Herbert R. Accuracy of Medicare claims data for estimation of cancer incidence and resection rates among elderly Americans. *Med Care*. 1991; 29(12):1226-36.
- 41) Agency for Healthcare Research and Quality. Inpatient Quality Indicators #26 (IQI #26): Coronary Artery Bypass Graft (CABG) Rate. AHRQ Quality Indicators (AHRQ QI) ICD-9-CM and ICD-10-CM/PCS Specification Enhanced Version 5.0. October 2015. Available from: [https://www.qualityindicators.ahrq.gov/Downloads/Modules/IQI/V50-ICD10/TechSpecs/IQI%2026%20Coronary%20Artery%20Bypass%20Graft%20\(CABG\)%20Rate.pdf](https://www.qualityindicators.ahrq.gov/Downloads/Modules/IQI/V50-ICD10/TechSpecs/IQI%2026%20Coronary%20Artery%20Bypass%20Graft%20(CABG)%20Rate.pdf)
