# Supplementary material for: Increasing risk of mortality across the spectrum of aortic stenosis is independent of comorbidity & treatment: An international, parallel cohort study of 248,464 patients
Source: PLOS journal article supplement (doi:10.1371/journal.pone.0268580), 2022-07-11
Supplement: S10 (10.1371/journal.pone.0268580.s010) [file journal.pone.0268580.s010]

**S6 Table. Baseline Characteristics of Included Patients (Australian Cohort)**

| Baseline Characteristics (Australian Cohort)        |                        |                        |                         |                             |                          |
|-----------------------------------------------------|------------------------|------------------------|-------------------------|-----------------------------|--------------------------|
|                                                     | Total<br>(N = 217,599) | No AS<br>(N = 173,776) | Mild AS<br>(N = 27,921) | Moderate AS<br>(N = 10,789) | Severe AS<br>(N = 5,113) |
| Demographic profile                                 |                        |                        |                         |                             |                          |
| Age, years                                          | 76.0 ± 7.4             | 75.4 ± 7.1             | 78.0 ± 7.5              | 79.3 ± 7.5                  | 80.4 ± 7.5               |
| Female, %                                           | 107,312 (49.3%)        | 86,409 (49.7%)         | 13,800 (49.4%)          | 4737 (43.9%)                | 2366 (46.3%)             |
| Race                                                | N/A                    |                        |                         |                             |                          |
| Clinical Profile                                    |                        |                        |                         |                             |                          |
| Inpatient, %                                        | N/A                    |                        |                         |                             |                          |
| Body mass index, m/kg²                              | 27.6 ± 5.7             | 27.5 ± 5.7             | 28.1 ± 6.1              | 27.9 ± 5.7                  | 26.8 ± 5.5               |
| Systolic blood pressure, mmHg                       | 140 ± 23.1             | 139 ± 22.9             | 142 ± 23.3              | 144 ± 24.0                  | 141 ± 24.5               |
| Diastolic blood pressure, mmHg                      | 77.3 ± 11.3            | 77.4 ± 11.2            | 76.0 ± 11.9             | 77.8 ± 11.2                 | 76.5 ± 11.6              |
| Heart rate, beats per minute                        | 72.2 ± 15.7            | 72.2 ± 15.8            | 71.6 ± 15.8             | 72.8 ± 15.4                 | 73.4 ± 15.8              |
| Estimated glomerular filtration rate, mL/min/1.73m² | N/A                    |                        |                         |                             |                          |
| NT-proBNP, pg/ml                                    | N/A                    |                        |                         |                             |                          |
| Past Medical History                                |                        |                        |                         |                             |                          |
| Specific past history                               | N/A                    |                        |                         |                             |                          |
| Any left heart disease, %                           | 76,014 (43.7%)         | 13,534 (48.5%)         | 6676 (61.9%)            | 3806 (74.4%)                | 3806 (74.4%)             |
| Aortic Valve Profile                                |                        |                        |                         |                             |                          |
| Peak aortic velocity, m/s                           | 1.7 ± 0.7              | 1.4 ± 0.3              | 2.4 ± 0.3               | 3.3± 0.3                    | 4.5 ± 0.5                |
| Mean aortic gradient, mmHg                          | 9.6 ± 11.2             | 4.5 ± 1.8              | 13.5 ± 2.7              | 25.8 ± 5.6                  | 49.7 ± 12.8              |
| Aortic valve area, cm²                              | 2.3 ± 0.9              | 2.6 ± 0.8              | 1.7 ± 0.6               | 1.1 ± 0.4                   | 0.8 ± 0.3                |
| Aortic regurgitation, %                             | 3981 (4.4%)            | 2,425 (3.1%)           | 889 (11.7%)             | 265 (15.2%)                 | 251 (11.4%)              |
| Right Ventricular Function & Dimensions             |                        |                        |                         |                             |                          |
| Peak tricuspid regurgitant velocity, m/s            | 2.8 ± 0.5              | 2.7 ± 0.5              | 2.9 ± 0.5               | 3.0 ± 0.5                   | 3.1 ± 0.6                |
| Moderate or greater tricuspid regurgitation, %      | 19,826 (26.7%)         | 15,300 (26.2%)         | 2674 (29.0%)            | 1119 (28.7%)                | 563 (28.7%)              |
| Left Ventricular Function & Dimensions              |                        |                        |                         |                             |                          |
| Left atrial volume index, mL/m²                     | 37.0 (27.0, 58.0)      | 36.0 (27.0, 57.0)      | 38.0 (29.0, 52.0)       | 47.0 (33.0, 82.0)           | 48.0 (35.0, 77.3)        |
| Left ventricular end-diastolic dimension, cm        | 4.7 ± 0.7              | 4.7 ± 0.8              | 4.6 ± 0.7               | 4.6 ± 0.8                   | 4.6 ± 0.8                |
| Left ventricular end-systolic dimension, cm         | 3.0 ± 0.8              | 3.0 ± 0.8              | 2.9 ± 0.8               | 2.9 ± 0.8                   | 2.9 ± 0.8                |
| Left ventricular ejection fraction, %               | 61.1 ± 13.9            | 60.7 ± 13.8            | 62.4 ± 13.4             | 63.2 ± 14.5                 | 63.2 ± 14.3              |
| Transmitral E/e⁺ ratio                              | 12.1 ± 5.4             | 11.7 ± 5.1             | 13.8 ± 6.3              | 14.5 ± 6.4                  | 15.9 ± 7.5               |
| Transmitral E/A ratio                               | 1.0 ± 0.7              | 1.0 ± 0.7              | 1.0 ± 0.5               | 1.0 ± 0.8                   | 1.0 ± 0.9                |
| Stroke volume index, mL/m²                          | 40.8 ± 12.3            | 39.9 ± 11.7            | 44.9 ± 13.9             | 44.8 ± 13.9                 | 43.9 ± 14.0              |
| Moderate or greater mitral regurgitation, %         | 20,032 (14.9%)         | 15,497 (14.3%)         | 2605 (15.8%)            | 1246 (18.5%)                | 684 (21.1%)              |
| Pharmacotherapy                                     |                        |                        |                         |                             |                          |
| Specific treatments                                 | N/A                    |                        |                         |                             |                          |

Listed is the comparison of baseline characteristics at the time of an individual's last known echocardiogram across aortic stenosis stages in the Australian cohort. Values are presented as means  $\pm$  standard deviations unless otherwise indicated. AS = aortic stenosis, N = number.
